# Supplementary material for: Comparison of the efficacy and safety of low-intensity extracorporeal shock wave therapy versus on-demand sildenafil for erectile dysfunction
Source: PubMed Central journal article supplement — Transl Androl Urol. 2021 Feb;10(2):860–8. doi: 10.21037/tau-20-1069 (PMC7947449; doi:10.21037/tau-20-1069), 2021-02
Supplement: tau-10-02-860-dss.pdf [file tau-10-02-860-dss.pdf]

## Data Sharing Statement

|                     |                                                                                                                                                     |                                                                |
|---------------------|-----------------------------------------------------------------------------------------------------------------------------------------------------|----------------------------------------------------------------|
| <b>Article Info</b> | <a href="http://dx.doi.org/10.21037/tau-20-1069">http://dx.doi.org/10.21037/tau-20-1069</a>                                                         |                                                                |
| <b>Item</b>         | <b>Question</b>                                                                                                                                     | <b>Authors' Response<br/>(place - if not applicable)</b>       |
| 1                   | Would you like to share data collected for your study to others?                                                                                    | Yes.                                                           |
| 2                   | If not, would you like to share the reason for your decision?                                                                                       | -                                                              |
| 3                   | What data in particular will be shared?                                                                                                             | Demographics, parameters mentioned in the manuscript.          |
| 4                   | Any other documents will be shared? Such as study protocol, statistical analysis plan, informed consent form, clinical study report, analytic code. | No. Because this information was introduced in the manuscript. |
| 5                   | When will data availability begin?                                                                                                                  | After publication.                                             |
| 6                   | When will data availability end?                                                                                                                    | 1 year.                                                        |
| 7                   | To whom will you share the data?                                                                                                                    | Those who are willing to do meta-analysis or pooled analysis.  |
| 8                   | For what type of analysis or purpose?                                                                                                               | Meta-analysis or pooled analysis                               |
| 9                   | How or where can the data/documents be obtained?                                                                                                    | By contacting corresponding author.                            |
| 10                  | Any other restrictions?                                                                                                                             | No.                                                            |
